# Supplementary material
Source: PubMed Central journal article supplement (PMC5566309)

## **Online Data Supplement**

### **Intensive Care Unit Admission and Survival among Older Patients with Chronic Obstructive Pulmonary Disease, Heart Failure, or Myocardial Infarction**

Thomas S. Valley, MD, MSc, Michael W. Sjoding, MD, MSc, Andrew M. Ryan, PhD, Theodore J. Iwashyna, MD, PhD, Colin R. Cooke, MD, MSc, MS

**eTable 1:** International Classification of Disease, Ninth Revision, Clinical Modification (ICD-9-CM) Codes

| <b>Diagnosis</b>                    | <b>ICD-9-CM Codes</b>                                                                                                                                         |
|-------------------------------------|---------------------------------------------------------------------------------------------------------------------------------------------------------------|
| COPD                                | 491.21, 491.22, 491.8, 491.9, 492.8, 493.20, 493.21, 493.22, 496                                                                                              |
| HF                                  | 401.01, 402.11, 402.91, 404.01, 404.03, 404.11, 404.13, 404.91, 404.93, 428.xx                                                                                |
| AMI                                 | 410.xx                                                                                                                                                        |
| Pneumonia                           | 480.0-480.3, 480.8, 480.9, 481, 482.0, 482.1, 482.2, 482.30-482.32, 482.39-482.41, 482.49, 482.81-482.84, 482.89, 482.9, 483.0, 483.1, 483.8, 485, 486, 487.0 |
| Acute respiratory failure           | 518.81, 518.82, 518.84, 799.1                                                                                                                                 |
| Sepsis                              | 038.xx, 785.52, 790.7, 995.91, 995.92                                                                                                                         |
| Shock                               | 458, 785.5- 785.59, 958.4, 998.0                                                                                                                              |
| Respiratory or cardiac arrest       | 427.5, 799.1                                                                                                                                                  |
| Procedures                          |                                                                                                                                                               |
| Invasive mechanical ventilation     | 96.7, 96.70, 96.71, 96.72, 93.90                                                                                                                              |
| Non-invasive mechanical ventilation | 93.90                                                                                                                                                         |
| Cardiac catheterization             | 37.21, 37.22, 37.23                                                                                                                                           |
| Cardiopulmonary resuscitation       | 99.60, 99.63                                                                                                                                                  |

**eTable 2:** Instrument analysis

Differential distance is highly correlated with ICU admission, conditional on other covariates.

| Condition | Model  | F-statistic | P value |
|-----------|--------|-------------|---------|
| COPD      | Linear | 191.3       | < 0.001 |
| HF        | Linear | 224.4       | < 0.001 |
| AMI       | Linear | 240.4       | < 0.001 |
| Total     | Linear | 330.2       | < 0.001 |

**Instrumental Variable – First Stage Results**

| Condition    | Beta                                                                                                    | 95% CI          | F-statistic (1, 2675) | P value | Adj. R-squared |
|--------------|---------------------------------------------------------------------------------------------------------|-----------------|-----------------------|---------|----------------|
| <b>COPD</b>  | -0.018 absolute change in ICU admission probability for every 10 mile increase in differential distance | (-0.02, -0.015) | 191                   | < 0.001 | 0.44           |
| <b>HF</b>    | -0.04 absolute change in ICU admission probability for every 10 mile increase in differential distance  | (-0.05, -0.04)  | 224                   | < 0.001 | 0.21           |
| <b>AMI</b>   | -0.05 absolute change in ICU admission probability for every 10 mile increase in differential distance  | (-0.05, -0.04)  | 240                   | < 0.001 | 0.16           |
| <b>Total</b> | -0.04 absolute change in ICU admission probability for every 10 mile increase in differential distance  | (-0.04, -0.03)  | 330                   | < 0.001 | 0.21           |

**eTable 3:** Patient characteristics by median differential distance for COPD

| <b>Characteristic</b>                  | <b>&lt; 3.7 miles<br/>No. (%)</b> | <b>≥ 3.7 miles<br/>No (%)</b> |
|----------------------------------------|-----------------------------------|-------------------------------|
| No. Patients                           | 302,524<br>(50.0)                 | 302,371<br>(50.0)             |
| ICU Patients                           | 77,480 (25.6)                     | 43,729 (14.5)                 |
| Age, mean (SD)                         | 77 (8)                            | 77 (8)                        |
| 65-74 years                            | 127,489<br>(42.1)                 | 128,552<br>(42.5)             |
| 75-84 years                            | 114,750<br>(37.9)                 | 115,597<br>(38.2)             |
| ≥ 85 years                             | 60,285 (19.9)                     | 58,222 (19.3)                 |
| Female                                 | 178,477<br>(59.0)                 | 176,061<br>(58.2)             |
| Race/Ethnicity                         |                                   |                               |
| White                                  | 254,753<br>(84.2)                 | 276,956<br>(91.6)             |
| Black                                  | 33,990 (11.2)                     | 18,551 (6.1)                  |
| Other                                  | 13781 (4.6)                       | 6864 (2.2)                    |
| Urbanicity                             |                                   |                               |
| Large Central Metropolitan             | 90,869 (30.0)                     | 19,860 (6.6)                  |
| Large Suburban Metropolitan            | 70,578 (23.3)                     | 74,738 (24.7)                 |
| Medium Metropolitan                    | 64,558 (21.3)                     | 64,550 (21.4)                 |
| Small Metropolitan                     | 28,927 (9.6)                      | 52,060 (17.2)                 |
| Micropolitan                           | 28,111 (9.3)                      | 55,681 (18.4)                 |
| Noncore                                | 19,481 (6.4)                      | 35,482 (11.7)                 |
| Median Household Income by Zip Code    |                                   |                               |
| < \$40,000                             | 83,983 (27.8)                     | 91,648 (30.3)                 |
| \$40,000-\$100,000                     | 204,028<br>(67.4)                 | 198,324<br>(65.6)             |
| ≥ \$100,000                            | 14,513 (4.8)                      | 12,399 (4.1)                  |
| Elixhauser Comorbidities, mean (SD)    | 2.6 (1.2)                         | 2.6 (1.2)                     |
| Admission Source                       |                                   |                               |
| Outpatient                             | 17,154 (5.7)                      | 20,850 (6.9)                  |
| Emergency Department                   | 284,452<br>(94.3)                 | 280,397<br>(93.1)             |
| Angus Organ Failure Score <sup>a</sup> |                                   |                               |
| 0                                      | 236,611<br>(78.2)                 | 248,008<br>(82.0)             |
| 1                                      | 50,695 (16.8)                     | 43,569 (14.4)                 |
| ≥ 2                                    | 15218 (5)                         | 10794 (3.6)                   |
| Year of Admission                      |                                   |                               |

|      |                   |                   |
|------|-------------------|-------------------|
| 2010 | 105,365<br>(50.8) | 102,188<br>(49.2) |
| 2011 | 104,426<br>(50.0) | 104,350<br>(50.0) |
| 2012 | 92,733 (49.2)     | 95,833 (50.8)     |

<sup>a</sup> Angus organ failure score, which identifies severity of illness by patient organ failures derived from the administrative record with a maximum score of six. Higher scores indicate more organ failures.

**eTable 4:** Patient characteristics by median differential distance for HF

| <b>Characteristic</b>                  | <b>&lt; 4.8 miles<br/>No. (%)</b> | <b>≥ 4.8 miles<br/>No (%)</b> |
|----------------------------------------|-----------------------------------|-------------------------------|
| No. Patients                           | 313,075<br>(50.0)                 | 313,099<br>(50.0)             |
| ICU Patients                           | 107,120<br>(34.2)                 | 47,325 (15.1)                 |
| Age, mean (SD)                         | 80 (8)                            | 80 (8)                        |
| 65-74 years                            | 87,698 (28.0)                     | 83,072 (26.5)                 |
| 75-84 years                            | 108,416<br>(34.6)                 | 110,521<br>(35.3)             |
| ≥ 85 years                             | 116,961<br>(37.4)                 | 119,506<br>(38.2)             |
| Female                                 | 173,391<br>(55.4)                 | 174,558<br>(55.8)             |
| Race/Ethnicity                         |                                   |                               |
| White                                  | 252,646<br>(80.7)                 | 272,066<br>(86.9)             |
| Black                                  | 44,549 (14.2)                     | 32,196 (10.3)                 |
| Other                                  | 15,880 (5.1)                      | 8,837 (2.8)                   |
| Urbanicity                             |                                   |                               |
| Large Central Metropolitan             | 98,701 (31.5)                     | 26,728 (8.5)                  |
| Large Suburban Metropolitan            | 78,475 (25.1)                     | 71,605 (22.9)                 |
| Medium Metropolitan                    | 63,568 (20.3)                     | 76,723 (24.5)                 |
| Small Metropolitan                     | 27,319 (8.7)                      | 50,957 (16.3)                 |
| Micropolitan                           | 25,549 (8.2)                      | 55,229 (17.6)                 |
| Noncore                                | 19,463 (6.2)                      | 31,857 (10.2)                 |
| Median Household Income by Zip Code    |                                   |                               |
| < \$40,000                             | 81,549 (26.1)                     | 89,818 (28.7)                 |
| \$40,000-\$100,000                     | 211,627<br>(67.6)                 | 210,204<br>(67.1)             |
| ≥ \$100,000                            | 19,899 (6.4)                      | 13,077 (4.2)                  |
| Elixhauser Comorbidities, mean (SD)    | 3.1 (1.0)                         | 3.2 (1.0)                     |
| Admission Source                       |                                   |                               |
| Outpatient                             | 19,277 (6.2)                      | 24,175 (7.8)                  |
| Emergency Department                   | 292,906<br>(93.8)                 | 287,698<br>(92.2)             |
| Angus Organ Failure Score <sup>a</sup> |                                   |                               |
| 0                                      | 218,743<br>(69.9)                 | 230,060<br>(73.5)             |
| 1                                      | 78,595 (25.1)                     | 71,825 (22.9)                 |
| ≥ 2                                    | 15,737 (4.9)                      | 11,214 (3.6)                  |

| Year of Admission |                   |                   |
|-------------------|-------------------|-------------------|
| 2010              | 110,623<br>(50.2) | 109,623<br>(49.8) |
| 2011              | 105,651<br>(50.0) | 105,738<br>(50.0) |
| 2012              | 96,801 (49.8)     | 97,738 (50.2)     |

<sup>a</sup>Angus organ failure score, which identifies severity of illness by patient organ failures derived from the administrative record with a maximum score of six. Higher scores indicate more organ failures.

**eTable 5:** Patient characteristics by median differential distance for AMI

| <b>Characteristic</b>                  | <b>&lt; 3.3 miles<br/>No. (%)</b> | <b>≥ 3.3 miles<br/>No (%)</b> |
|----------------------------------------|-----------------------------------|-------------------------------|
| No. Patients                           | 162,545<br>(50.1)                 | 162,184<br>(49.9)             |
| ICU Patients                           | 124,269<br>(76.5)                 | 86,349 (53.2)                 |
| Age, mean (SD)                         | 78 (8)                            | 78 (8)                        |
| 65-74 years                            | 62,688 (38.6)                     | 59,082 (36.4)                 |
| 75-84 years                            | 55,765 (34.3)                     | 55,696 (34.3)                 |
| ≥ 85 years                             | 44,092 (27.1)                     | 47,406 (29.2)                 |
| Female                                 | 77,847 (47.9)                     | 78,865 (48.6)                 |
| Race/Ethnicity                         |                                   |                               |
| White                                  | 136,915<br>(84.2)                 | 145,725<br>(89.9)             |
| Black                                  | 16,277 (10.0)                     | 11,298 (7.0)                  |
| Other                                  | 9,353 (5.8)                       | 5,161 (3.2)                   |
| Urbanicity                             |                                   |                               |
| Large Central Metropolitan             | 51,011 (31.4)                     | 14,850 (9.2)                  |
| Large Suburban Metropolitan            | 39,905 (24.6)                     | 35,639 (22.0)                 |
| Medium Metropolitan                    | 33,178 (20.4)                     | 39,853 (24.6)                 |
| Small Metropolitan                     | 16,750 (10.3)                     | 26,180 (16.1)                 |
| Micropolitan                           | 11,953 (7.4)                      | 27,847 (17.2)                 |
| Noncore                                | 9,748 (6.0)                       | 17,815 (11.0)                 |
| Median Household Income by Zip Code    |                                   |                               |
| < \$40,000                             | 38,482 (23.7)                     | 44,237 (27.3)                 |
| \$40,000-\$100,000                     | 113,919<br>(70.1)                 | 110,561<br>(68.2)             |
| ≥ \$100,000                            | 10,144 (6.2)                      | 7,386 (4.6)                   |
| Elixhauser Comorbidities, mean (SD)    | 2.5 (1.2)                         | 2.5 (1.2)                     |
| Admission Source                       |                                   |                               |
| Outpatient                             | 6,253 (3.9)                       | 8,858 (5.5)                   |
| Emergency Department                   | 155,621<br>(96.1)                 | 152,420<br>(94.5)             |
| Angus Organ Failure Score <sup>a</sup> |                                   |                               |
| 0                                      | 103,392<br>(63.6)                 | 111,149<br>(68.5)             |
| 1                                      | 40,576 (25.0)                     | 37,313 (23.0)                 |
| ≥ 2                                    | 18577 (11.5)                      | 13722 (8.5)                   |
| Year of Admission                      |                                   |                               |
| 2010                                   | 56,324 (50.1)                     | 56,127 (49.9)                 |
| 2011                                   | 54,082 (50.0)                     | 53,965 (50.0)                 |



|      |               |               |
|------|---------------|---------------|
| 2012 | 52,139 (50.0) | 52,092 (50.0) |
|------|---------------|---------------|

<sup>a</sup>Angus organ failure score, which identifies severity of illness by patient organ failures derived from the administrative record with a maximum score of six. Higher scores indicate more organ failures.

**eTable 6:** Hospital characteristics by quintile of ICU admission rates for COPD

| <b>Characteristics</b>                                    | <b>Quintile 1<br/>(&lt;12%)</b> | <b>Quintile 2<br/>(12-17%)</b> | <b>Quintile 3<br/>(18-23%)</b> | <b>Quintile 4<br/>(24-32%)</b> | <b>Quintile 5<br/>(&gt;32%)</b> |
|-----------------------------------------------------------|---------------------------------|--------------------------------|--------------------------------|--------------------------------|---------------------------------|
| No. Hospitals                                             | 539 (20.0)                      | 539 (20.0)                     | 538 (20.0)                     | 539 (20.0)                     | 538 (20.0)                      |
| Hospital Ownership                                        |                                 |                                |                                |                                |                                 |
| For-profit                                                | 89 (16.64)                      | 103 (19.22)                    | 105 (19.59)                    | 106 (19.81)                    | 125 (23.41)                     |
| Not-for-profit                                            | 378 (70.65)                     | 363 (67.72)                    | 347 (64.74)                    | 331 (61.87)                    | 324 (60.67)                     |
| Government                                                | 68 (12.71)                      | 70 (13.06)                     | 84 (15.67)                     | 98 (18.32)                     | 85 (15.92)                      |
| Medical School Affiliation                                | 190 (35.25)                     | 149 (27.64)                    | 177 (32.9)                     | 204 (37.85)                    | 209 (38.85)                     |
| Teaching Status                                           |                                 |                                |                                |                                |                                 |
| No Residents                                              | 428 (79.55)                     | 437 (81.08)                    | 432 (80.3)                     | 425 (78.85)                    | 433 (80.48)                     |
| Minor Teaching Program<br>( $< 0.25$ residents/bed)       | 64 (11.9)                       | 73 (13.54)                     | 73 (13.57)                     | 73 (13.54)                     | 62 (11.52)                      |
| Major Teaching Program<br>( $\geq 0.25$ residents/bed)    | 46 (8.55)                       | 29 (5.38)                      | 33 (6.13)                      | 41 (7.61)                      | 43 (7.99)                       |
| Hospital Beds                                             |                                 |                                |                                |                                |                                 |
| $< 100$                                                   | 144 (26.77)                     | 157 (29.13)                    | 130 (24.16)                    | 127 (23.56)                    | 115 (21.38)                     |
| 100-199                                                   | 167 (31.04)                     | 135 (25.05)                    | 164 (30.48)                    | 154 (28.57)                    | 161 (29.93)                     |
| $\geq 200$                                                | 227 (42.19)                     | 247 (45.83)                    | 244 (45.35)                    | 258 (47.87)                    | 262 (48.7)                      |
| Percent of ICU Beds                                       |                                 |                                |                                |                                |                                 |
| $\leq 5\%$                                                | 53 (9.85)                       | 28 (5.19)                      | 46 (8.55)                      | 23 (4.27)                      | 23 (4.28)                       |
| 5-10%                                                     | 299 (55.58)                     | 276 (51.21)                    | 221 (41.08)                    | 203 (37.66)                    | 185 (34.39)                     |
| $> 10\%$                                                  | 186 (34.57)                     | 235 (43.6)                     | 271 (50.37)                    | 313 (58.07)                    | 330 (61.34)                     |
| Hospital COPD Annual Case Volume, Mean (SD)               | 129 (111)                       | 124 (82)                       | 107 (84)                       | 83 (63)                        | 69 (59)                         |
| Nursing FTE <sup>a</sup> per 1000 Patient-Days, Mean (SD) | 3.6 (1.6)                       | 3.7 (1.3)                      | 3.8 (1.7)                      | 4.0 (1.7)                      | 4.2 (1.7)                       |
| Technology Index, Mean (SD) <sup>b</sup>                  | 23.4 (11.6)                     | 23.7 (11.5)                    | 24.3 (11.9)                    | 25.4 (12.5)                    | 25.6 (12.6)                     |
| Medicaid Patients                                         |                                 |                                |                                |                                |                                 |
| $< 7\%$                                                   | 228 (42.38)                     | 231 (42.86)                    | 191 (35.5)                     | 175 (32.47)                    | 160 (29.74)                     |
| 7-11%                                                     | 183                             | 172                            | 185                            | 162                            | 155                             |

|                |                |                |                |                |                |
|----------------|----------------|----------------|----------------|----------------|----------------|
|                | (34.01)        | (31.91)        | (34.39)        | (30.06)        | (28.81)        |
| > 11%          | 127<br>(23.61) | 136<br>(25.23) | 162<br>(30.11) | 202<br>(37.48) | 223<br>(41.45) |
| Census Regions |                |                |                |                |                |
| Northeast      | 143<br>(27.24) | 91 (16.88)     | 89 (16.54)     | 60 (11.15)     | 63 (11.75)     |
| Midwest        | 187<br>(35.62) | 197<br>(36.55) | 190<br>(35.32) | 185<br>(34.39) | 169<br>(31.53) |
| South          | 131<br>(24.95) | 179<br>(33.21) | 173<br>(32.16) | 180<br>(33.46) | 151<br>(28.17) |
| West           | 64 (12.19)     | 72 (13.36)     | 86 (15.99)     | 113 (21)       | 153<br>(28.54) |

<sup>a</sup> Full-time equivalents over the entire hospital

<sup>b</sup> Weighted sum of hospital capabilities, including obstetrics, ICU care, emergency department, trauma center, open heart surgery, radiation therapy, CT, diagnostic radiology, magnetic resonance imaging, positron-emission tomography, single-photon emission CT, ultrasonography, and transplantation service

**eTable 7:** Hospital characteristics by quintile of ICU admission rates for HF

| <b>Characteristics</b>                                       | <b>Quintile 1<br/>(&lt;12%)</b> | <b>Quintile 2<br/>(12-18%)</b> | <b>Quintile 3<br/>(19-31%)</b> | <b>Quintile 4<br/>(32-55%)</b> | <b>Quintile 5<br/>(&gt;55%)</b> |
|--------------------------------------------------------------|---------------------------------|--------------------------------|--------------------------------|--------------------------------|---------------------------------|
| No. Hospitals                                                | 538 (20.0)                      | 538 (20.0)                     | 538 (20.0)                     | 538 (20.0)                     | 538 (20.0)                      |
| Hospital Ownership                                           |                                 |                                |                                |                                |                                 |
| For-profit                                                   | 75 (13.99)                      | 82 (15.36)                     | 119<br>(22.16)                 | 120<br>(22.51)                 | 131<br>(24.49)                  |
| Not-for-profit                                               | 394<br>(73.51)                  | 360<br>(67.42)                 | 324<br>(60.34)                 | 323 (60.6)                     | 340<br>(63.55)                  |
| Government                                                   | 67 (12.5)                       | 92 (17.23)                     | 94 (17.5)                      | 90 (16.89)                     | 64 (11.96)                      |
| Medical School Affiliation                                   | 223<br>(41.45)                  | 173<br>(32.16)                 | 147<br>(27.32)                 | 190<br>(35.32)                 | 193<br>(35.87)                  |
| Teaching Status                                              |                                 |                                |                                |                                |                                 |
| No Residents                                                 | 401<br>(74.67)                  | 432 (80.3)                     | 457<br>(84.94)                 | 415<br>(77.14)                 | 448<br>(83.27)                  |
| Minor Teaching Program<br>( $< 0.25$ residents/bed)          | 82 (15.27)                      | 67 (12.45)                     | 50 (9.29)                      | 82 (15.24)                     | 63 (11.71)                      |
| Major Teaching Program<br>( $\geq 0.25$ residents/bed)       | 54 (10.06)                      | 39 (7.25)                      | 31 (5.76)                      | 41 (7.62)                      | 27 (5.02)                       |
| Hospital Beds                                                |                                 |                                |                                |                                |                                 |
| $< 100$                                                      | 120<br>(22.35)                  | 138<br>(25.65)                 | 179<br>(33.27)                 | 141<br>(26.21)                 | 94 (17.47)                      |
| 100-199                                                      | 139<br>(25.88)                  | 141<br>(26.21)                 | 172<br>(31.97)                 | 144<br>(26.77)                 | 183<br>(34.01)                  |
| $\geq 200$                                                   | 278<br>(51.77)                  | 259<br>(48.14)                 | 187<br>(34.76)                 | 253<br>(47.03)                 | 261<br>(48.51)                  |
| Percent of Total that are ICU<br>Beds                        |                                 |                                |                                |                                |                                 |
| $\leq 5\%$                                                   | 39 (7.26)                       | 44 (8.18)                      | 40 (7.43)                      | 25 (4.65)                      | 24 (4.46)                       |
| 5-10%                                                        | 299<br>(55.68)                  | 247<br>(45.91)                 | 218<br>(40.52)                 | 222<br>(41.26)                 | 198 (36.8)                      |
| $> 10\%$                                                     | 199<br>(37.06)                  | 247<br>(45.91)                 | 280<br>(52.04)                 | 291<br>(54.09)                 | 316<br>(58.74)                  |
| Hospital HF Annual Case<br>Volume, Mean (SD)                 | 166 (149)                       | 140 (107)                      | 91 (89)                        | 59 (64)                        | 64 (75)                         |
| Nursing FTE <sup>a</sup> per 1000<br>Patient-Days, Mean (SD) | 3.9 (1.9)                       | 3.8 (1.6)                      | 3.7 (1.4)                      | 3.9 (1.5)                      | 4.1 (1.5)                       |
| Technology Index, Mean (SD) <sup>b</sup>                     | 25.2<br>(12.0)                  | 24.2 (11.9)                    | 23.1<br>(11.8)                 | 25.0<br>(12.4)                 | 25.0<br>(12.0)                  |
| Medicaid Patients                                            |                                 |                                |                                |                                |                                 |
| $< 7\%$                                                      | 210<br>(39.11)                  | 212<br>(39.41)                 | 208<br>(38.66)                 | 193<br>(35.87)                 | 161<br>(29.93)                  |

|                |                |                |                |                |                |
|----------------|----------------|----------------|----------------|----------------|----------------|
| 7-11%          | 198<br>(36.87) | 177 (32.9)     | 170 (31.6)     | 151<br>(28.07) | 161<br>(29.93) |
| > 11%          | 129<br>(24.02) | 149 (27.7)     | 160<br>(29.74) | 194<br>(36.06) | 216<br>(40.15) |
| Census Regions |                |                |                |                |                |
| Northeast      | 131<br>(24.76) | 94 (17.47)     | 76 (14.15)     | 72 (13.38)     | 73 (13.7)      |
| Midwest        | 187<br>(35.35) | 192<br>(35.69) | 184<br>(34.26) | 190<br>(35.32) | 175<br>(32.83) |
| South          | 129<br>(24.39) | 183<br>(34.01) | 185<br>(34.45) | 183<br>(34.01) | 134<br>(25.14) |
| West           | 82 (15.5)      | 69 (12.83)     | 92 (17.13)     | 93 (17.29)     | 151<br>(28.33) |

<sup>a</sup> Full-time equivalents over the entire hospital

<sup>b</sup> Weighted sum of hospital capabilities, including obstetrics, ICU care, emergency department, trauma center, open heart surgery, radiation therapy, CT, diagnostic radiology, magnetic resonance imaging, positron-emission tomography, single-photon emission CT, ultrasonography, and transplantation service

**eTable 8:** Hospital characteristics by quintile of ICU admission rates for AMI

| <b>Characteristics</b>                                       | <b>Quintile 1<br/>(&lt;43%)</b> | <b>Quintile 2<br/>(43-61%)</b> | <b>Quintile 3<br/>(62-80%)</b> | <b>Quintile 4<br/>(81-94%)</b> | <b>Quintile 5<br/>(&gt;94%)</b> |
|--------------------------------------------------------------|---------------------------------|--------------------------------|--------------------------------|--------------------------------|---------------------------------|
| No. Hospitals                                                | 535 (20.0)                      | 536 (20.1)                     | 532 (19.9)                     | 534 (20.0)                     | 534 (20.0)                      |
| Hospital Ownership                                           |                                 |                                |                                |                                |                                 |
| For-profit                                                   | 64 (12.01)                      | 94 (17.64)                     | 121<br>(23.05)                 | 118<br>(22.14)                 | 123<br>(23.12)                  |
| Not-for-profit                                               | 394<br>(73.92)                  | 348<br>(65.29)                 | 308<br>(58.67)                 | 335<br>(62.85)                 | 351<br>(65.98)                  |
| Government                                                   | 75 (14.07)                      | 91 (17.07)                     | 96 (18.29)                     | 80 (15.01)                     | 58 (10.9)                       |
| Medical School Affiliation                                   | 169<br>(31.59)                  | 174<br>(32.46)                 | 165<br>(31.02)                 | 201<br>(37.64)                 | 212 (39.7)                      |
| Teaching Status                                              |                                 |                                |                                |                                |                                 |
| No Residents                                                 | 435<br>(81.46)                  | 441<br>(82.28)                 | 427<br>(80.26)                 | 407<br>(76.22)                 | 422<br>(79.03)                  |
| Minor Teaching Program<br>( $< 0.25$ residents/bed)          | 57 (10.67)                      | 63 (11.75)                     | 66 (12.41)                     | 81 (15.17)                     | 79 (14.79)                      |
| Major Teaching Program<br>( $\geq 0.25$ residents/bed)       | 42 (7.87)                       | 32 (5.97)                      | 39 (7.33)                      | 46 (8.61)                      | 33 (6.18)                       |
| Hospital Beds                                                |                                 |                                |                                |                                |                                 |
| < 100                                                        | 197<br>(36.89)                  | 157<br>(29.29)                 | 141 (26.5)                     | 98 (18.35)                     | 66 (12.36)                      |
| 100-199                                                      | 134<br>(25.09)                  | 147<br>(27.43)                 | 167<br>(31.39)                 | 163<br>(30.52)                 | 164<br>(30.71)                  |
| $\geq 200$                                                   | 203<br>(38.01)                  | 232<br>(43.28)                 | 224<br>(42.11)                 | 273<br>(51.12)                 | 304<br>(56.93)                  |
| Percent of Total that are ICU<br>Beds                        |                                 |                                |                                |                                |                                 |
| $\leq 5\%$                                                   | 51 (9.55)                       | 37 (6.9)                       | 38 (7.14)                      | 21 (3.93)                      | 22 (4.12)                       |
| 5-10%                                                        | 280<br>(52.43)                  | 245<br>(45.71)                 | 231<br>(43.42)                 | 217<br>(40.64)                 | 206<br>(38.58)                  |
| > 10%                                                        | 203<br>(38.01)                  | 254<br>(47.39)                 | 263<br>(49.44)                 | 296<br>(55.43)                 | 306 (57.3)                      |
| Hospital MI Annual Case<br>Volume, Mean (SD)                 | 52 (58)                         | 55 (55)                        | 44 (46)                        | 39 (35)                        | 41 (37)                         |
| Nursing FTE <sup>a</sup> per 1000<br>Patient-Days, Mean (SD) | 3.7 (1.6)                       | 3.8 (1.7)                      | 3.8 (1.5)                      | 4.0 (1.4)                      | 4.2 (1.6)                       |
| Technology Index, Mean (SD) <sup>b</sup>                     | 21.7<br>(11.4)                  | 23.9 (12.2)                    | 23.5<br>(11.7)                 | 26.6<br>(12.1)                 | 27.0<br>(11.9)                  |
| Medicaid Patients                                            |                                 |                                |                                |                                |                                 |
| < 7%                                                         | 245<br>(45.88)                  | 203<br>(37.87)                 | 199<br>(37.41)                 | 172<br>(32.21)                 | 154<br>(28.84)                  |

|                |                |                |                |                |                |
|----------------|----------------|----------------|----------------|----------------|----------------|
| 7-11%          | 187<br>(35.02) | 177<br>(33.02) | 178<br>(33.46) | 163<br>(30.52) | 150<br>(28.09) |
| > 11%          | 102 (19.1)     | 156 (29.1)     | 155<br>(29.14) | 199<br>(37.27) | 230<br>(43.07) |
| Census Regions |                |                |                |                |                |
| Northeast      | 138<br>(26.04) | 83 (15.6)      | 71 (13.4)      | 76 (14.23)     | 78 (14.72)     |
| Midwest        | 192<br>(36.23) | 187<br>(35.15) | 187<br>(35.28) | 203<br>(38.01) | 157<br>(29.62) |
| South          | 122<br>(23.02) | 199<br>(37.41) | 194 (36.6)     | 154<br>(28.84) | 135<br>(25.47) |
| West           | 78 (14.72)     | 63 (11.84)     | 78 (14.72)     | 101<br>(18.91) | 160<br>(30.19) |

<sup>a</sup> Full-time equivalents over the entire hospital

<sup>b</sup> Weighted sum of hospital capabilities, including obstetrics, ICU care, emergency department, trauma center, open heart surgery, radiation therapy, CT, diagnostic radiology, magnetic resonance imaging, positron-emission tomography, single-photon emission CT, ultrasonography, and transplantation service

**eTable 9:** Multivariable regression results<sup>a</sup>

| <b>COPD</b>      |                                     |                |
|------------------|-------------------------------------|----------------|
| <b>Model</b>     | <b>Absolute Difference (95% CI)</b> | <b>P value</b> |
| 30-day mortality | 3.7% (3.4, 4.1)                     | < 0.001        |
| Hospital costs   | \$5,020 (4741, 5298)                | < 0.001        |
| <b>HF</b>        |                                     |                |
| <b>Model</b>     | <b>Absolute Difference (95% CI)</b> | <b>P value</b> |
| 30-day mortality | 1.8% (1.5, 2.1)                     | < 0.001        |
| Hospital costs   | \$5,764 (5373, 6156)                | < 0.001        |
| <b>AMI</b>       |                                     |                |
| <b>Model</b>     | <b>Absolute Difference (95% CI)</b> | <b>P value</b> |
| 30-day mortality | -1.8% (-2.1, -1.5)                  | < 0.001        |
| Hospital costs   | \$8,117 (7781, 8453)                | < 0.001        |

<sup>a</sup> Model adjusted for all variables in tables 1 and 2 in addition to all 29 individual Elixhauser comorbidities. Angus organ failure score, which identifies severity of illness by patient organ failures derived from the administrative record with a maximum score of six, was defined to include all organ failures numbered 0 to  $\geq 5$ . Higher scores indicate more organ failures. Hospital region included the nine U.S. census defined regions. All standard errors for models were adjusted for clustering of patients within hospitals.



**eTable 10:** Sensitivity analysis<sup>a,b</sup>

| HF (n=708,758)   |                              |         |
|------------------|------------------------------|---------|
| Model            | Absolute Difference (95% CI) | P value |
| 30-day mortality | 1.3% (-0.4, 3.1)             | 0.14    |
| Hospital costs   | \$2,537 (997,4076)           | 0.001   |

<sup>a</sup> Model adjusted for all variables in tables 1 and 2 in addition to all 29 individual Elixhauser comorbidities. Angus organ failure score, which identifies severity of illness by patient organ failures derived from the administrative record with a maximum score of six, was defined to include all organ failures numbered 0 to  $\geq 5$ . Higher scores indicate more organ failures. Hospital region included the nine U.S. census defined regions. All standard errors for models were adjusted for clustering of patients within hospitals.

<sup>b</sup> 2-stage least squared regression of all patients using differential distance to nearest high-ICU use hospital as instrumental variable, adjusted for all variables in tables 1 and 2, and for clustering of patients within hospitals

**eFigure 1:** Study selection criteria/recruitment table for COPD

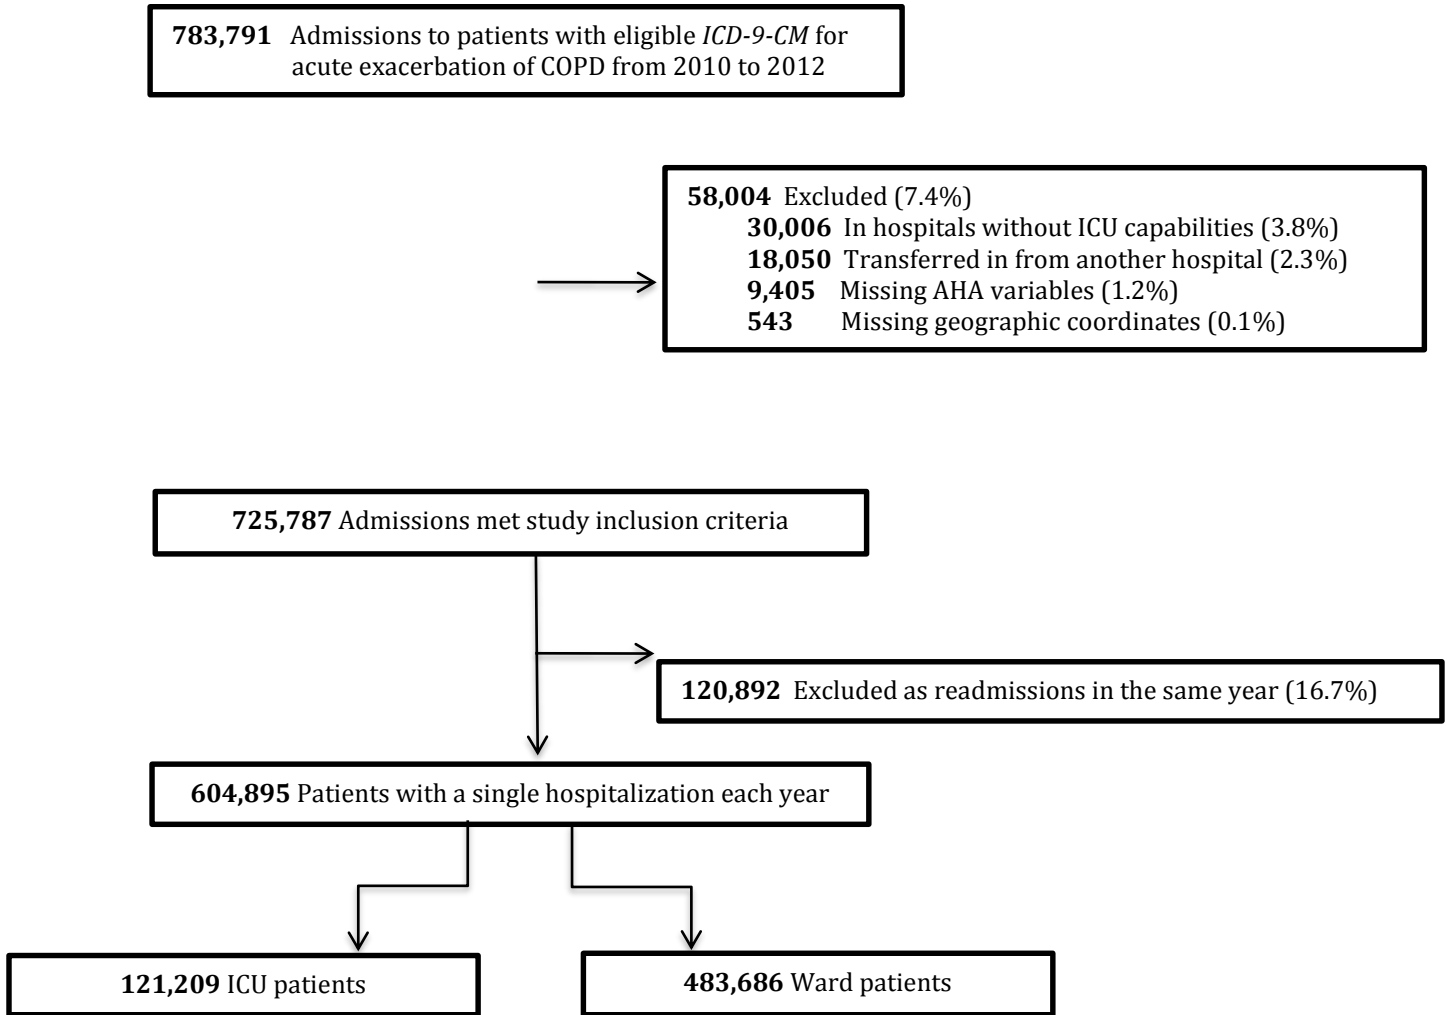

**eFigure 2:** Study selection criteria/recruitment table for HF

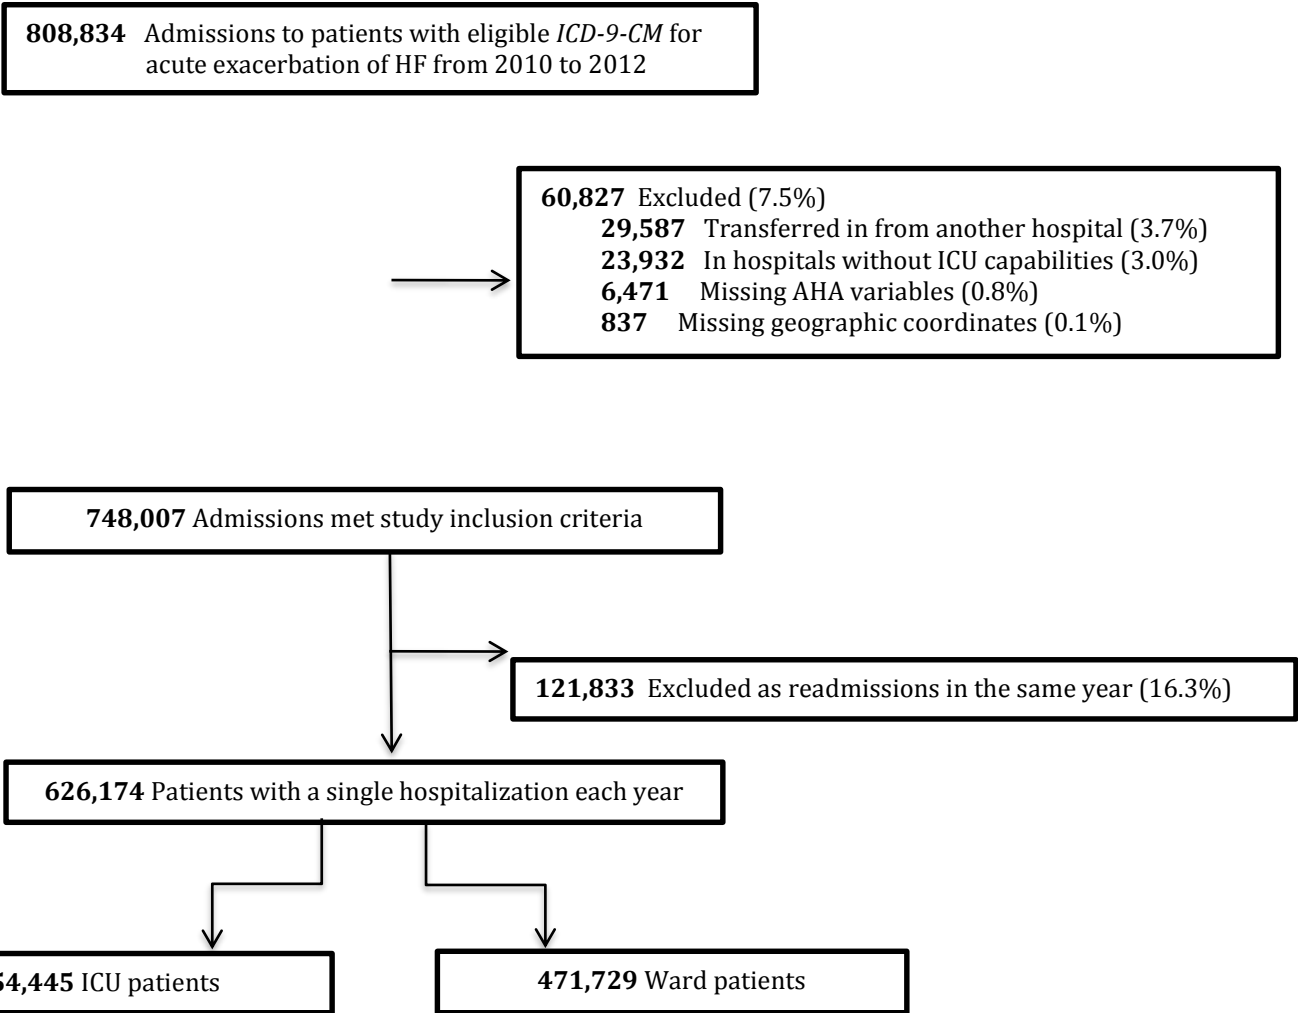

**eFigure 3:** Study selection criteria/recruitment table for AMI

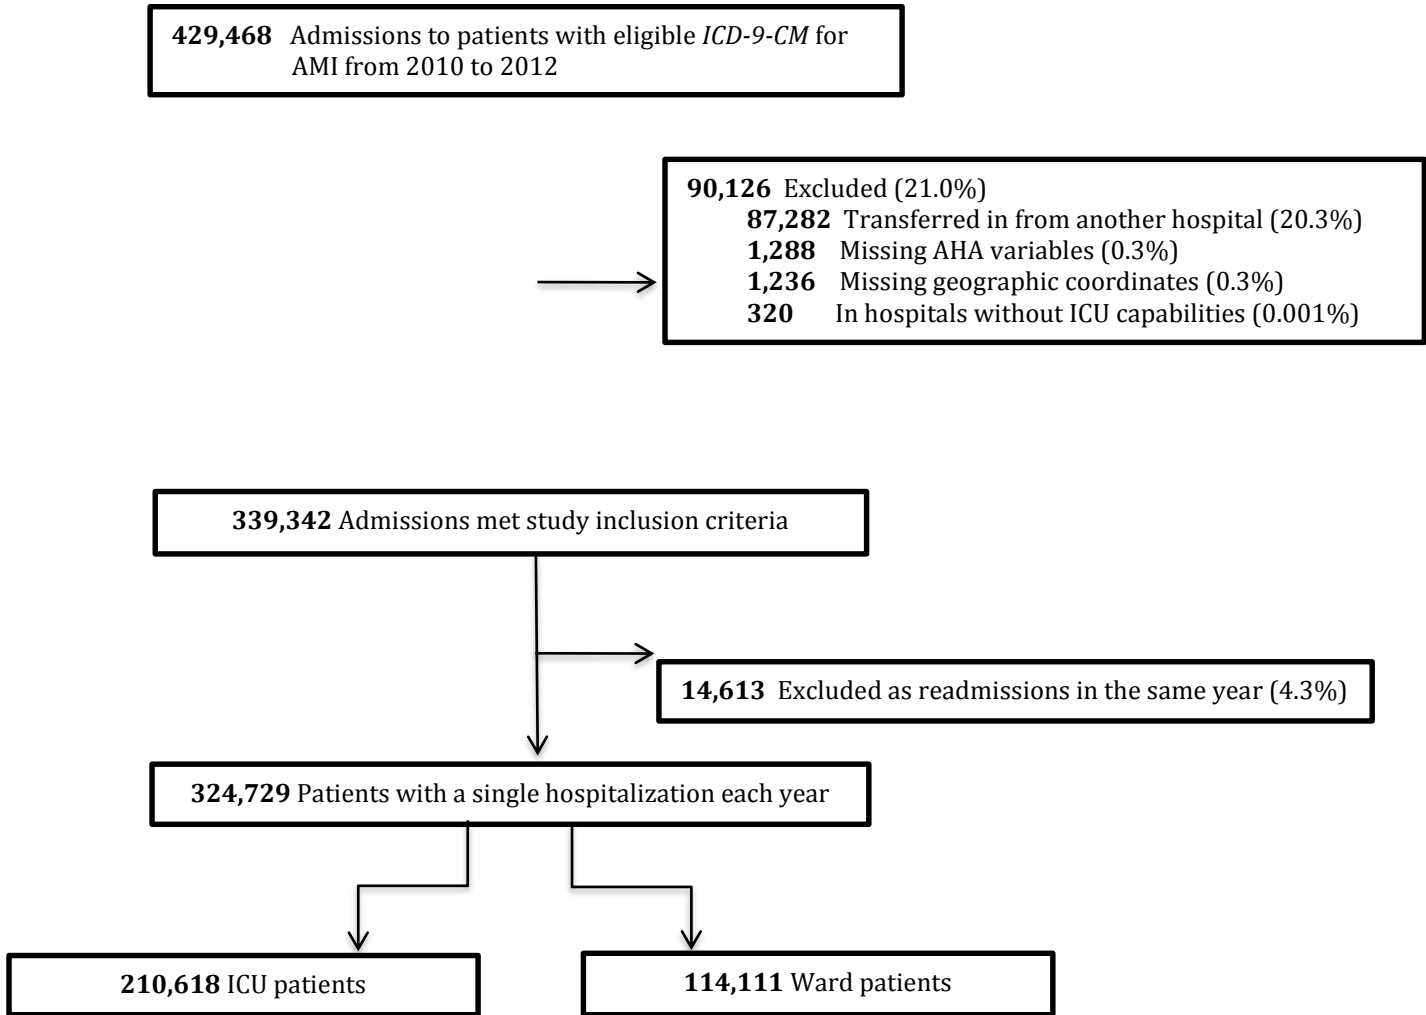

Supplement: AnnalsATS.201611-847OC_valley_data_supplement.pdf [file AnnalsATS.201611-847OC_valley_data_supplement.pdf]
